# Supplementary material for: Comprehensive Analysis of Prognostic Value of MEX3A and Its Relationship with Immune Infiltrates in Ovarian Cancer
Source: Hindawi journal article supplement (doi:10.1155/2021/5574176), 2021-06-03

a

Disease Summary for MEX3A

| Analysis Type by Cancer     | Cancer vs. Normal |   |
|-----------------------------|-------------------|---|
| Bladder Cancer              |                   |   |
| Brain and CNS Cancer        | 4                 | 1 |
| Breast Cancer               | 4                 |   |
| Cervical Cancer             |                   |   |
| Colorectal Cancer           | 4                 |   |
| Esophageal Cancer           |                   |   |
| Gastric Cancer              |                   |   |
| Head and Neck Cancer        |                   |   |
| Kidney Cancer               | 1                 |   |
| Leukemia                    |                   |   |
| Liver Cancer                |                   |   |
| Lung Cancer                 | 1                 |   |
| Lymphoma                    |                   |   |
| Melanoma                    | 1                 |   |
| Myeloma                     |                   |   |
| Other Cancer                | 4                 |   |
| Ovarian Cancer              | 2                 |   |
| Pancreatic Cancer           |                   | 1 |
| Prostate Cancer             | 1                 |   |
| Sarcoma                     |                   |   |
| Significant Unique Analyses | 22                | 2 |
| Total Unique Analyses       | 241               |   |

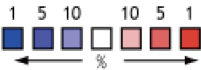

b

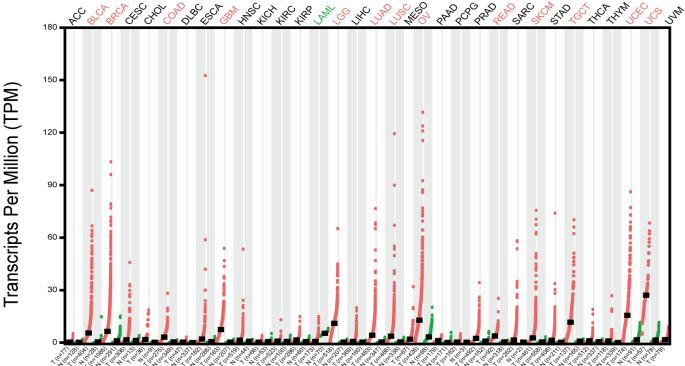

c

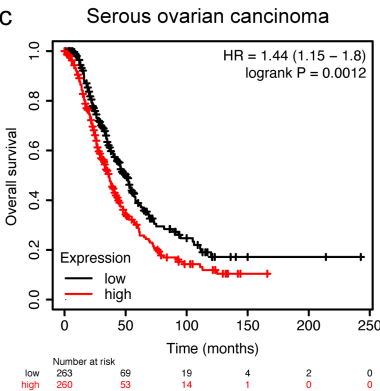

d

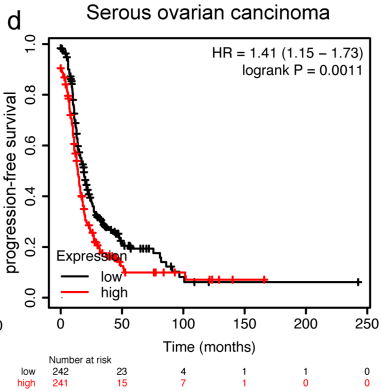

e

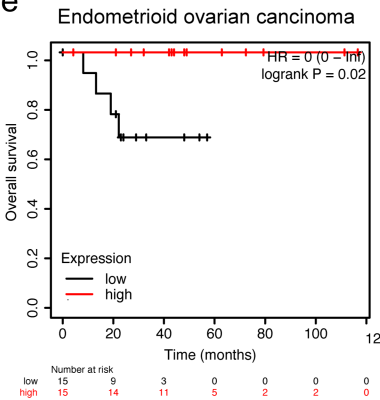

f

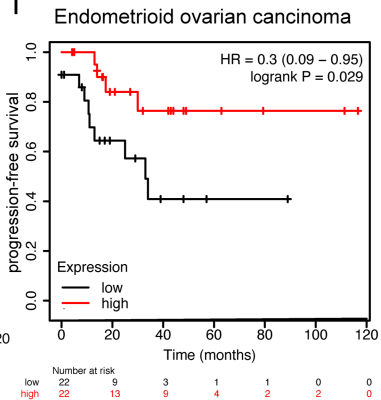

Supplement: f1 [file 5574176.f1.zip]
